# Supplementary material for: LEGO® Bricks as Building Blocks for Centimeter-Scale Biological Environments: The Case of Plants
Source: PLOS journal article supplement (doi:10.1371/journal.pone.0100867), 2014-06-25
Supplement: S10 (10.1371/journal.pone.0100867.s010) [file journal.pone.0100867.s010]

---

# LEGO® Bricks As Building Blocks For Centimeter-Scale Biological Environments: The Case Of Plants

---

KARA R. LIND<sup>†</sup>, TOM SIZMUR<sup>†‡§</sup>, SAIDA BENOMAR<sup>†‡</sup>, ANTHONY MILLER<sup>†||</sup>, LUDOVICO  
CADEMARTIRI<sup>†‡\*\*</sup>

<sup>†</sup> Department of Materials Science & Engineering, Iowa State University, Ames, IA, 50011

<sup>‡</sup> Ames Laboratory, US Department of Energy, Iowa State University, Ames, IA, 50011

<sup>||</sup> Department of Agronomy, Iowa State University, Ames, IA, 50011

<sup>±</sup> Department of Chemical & Biological Engineering, Iowa State University, Ames, IA,  
50011

<sup>§</sup> current address: Department of Sustainable Soils and Grassland Systems, Rothamsted  
Research, Harpenden, Hertfordshire, AL5 2JQ, United Kingdom

Author to whom correspondence should be addressed: [lcademar@iastate.edu](mailto:lcademar@iastate.edu)

---

---

TABLE S1

---

---

| Solution # | Salt                       | Additional components                | Dye                           |
|------------|----------------------------|--------------------------------------|-------------------------------|
| 1          | 100 mg potassium phosphate | 10 ml milliQ water<br>30 mg phytagel | Green food coloring<br>30 µl  |
| 2          | 100 mg potassium nitrate   | 10 ml milliQ water<br>30 mg phytagel | Yellow food coloring<br>30 µl |
| 3          | 100 mg calcium chloride    | 10 ml milliQ water<br>30 mg phytagel | Red food coloring<br>30 µl    |
| 4          | 100 mg magnesium sulfate   | 10 ml milliQ water<br>30 mg phytagel | Blue food coloring<br>20 µl   |

**Table S1:** Preparation of salt solutions for cylindrical dye experiment.
